# Supplementary material for: 20-Hydroxyecdysone Primes Innate Immune Responses That Limit Bacterial and Malarial Parasite Survival in Anopheles gambiae
Source: PubMed Central journal article supplement (PMC7160685; doi:10.1128/msphere.00983-19), 2020-04-15
Supplement: mSphere.00983-19-st001.pdf [file mSphere.00983-19-st001.pdf]

**Table S1. Primers used for qRT-PCR analysis**

| <b>Primer</b>                        | <b>Gene ID</b> | <b>Sequence (5'- 3')</b>                                     |
|--------------------------------------|----------------|--------------------------------------------------------------|
| Allantoinase-F<br>Allantoinase-R     | AGAP000239     | CCCACGACGGTAAGGTGACG<br>TCCCGGCATGAGCATCAAAT                 |
| Cecropin 1-F<br>Cecropin 1-R         | AGAP000693     | TTCATCTTTGTCGTGCTGGC<br>GCACTGCCAGCACGACAAAG                 |
| Cecropin 3-F<br>Cecropin 3-R         | AGAP000694     | ACGTAAGTGAACACCTGCGCGTT<br>GCGCTGTGTGCGCCGATGAA              |
| Collagen-F<br>Collagen-R             | AGAP009200     | TGGGACTGCGAGGATTCGAG<br>ACCTCGTCCGACTGGCTGTG                 |
| GTMS1-F<br>GTMS1-R                   | AGAP000165     | GCGGTGCTGGTGGTGAAGAT<br>CGTCCGGATCGTCGAACTTG                 |
| HR4-F<br>HR4-R                       | AGAP004693     | TCGGGGTCAAATGCATCACA<br>GCTGCAGTTGGGTTCCGAGA                 |
| LRR-F<br>LRR-R                       | AGAP004016     | GCTCGTTTTGTGCCGGAATG<br>GCCCCGCTTCCTGCAGCTTAT                |
| LYSC1-F<br>LYSC1-R                   | AGAP007347     | TTCAGCACATCGGCGACAAA<br>TCCAGCCGTACCAGGCGTTA                 |
| PCAAT-F<br>PCAAT-R                   | AGAP010508     | TGCGGTGTTCCGGATATTGG<br>AGGCGCCACTTCATCCATCC                 |
| PPO3-F<br>PPO3-R                     | AGAP004975     | CTATTCGCCATGATCTCCAACACTACG<br>ATGACAGTGTTGGTTGGTCAAACGGATCT |
| rpS7-F<br>rpS7-R                     | AGAP010592     | ACCCCATCGAACACAAAGTTGACACT<br>CTCCGATCTTTCACATTCCAGTAGCAC    |
| Solute Carrier-F<br>Solute Carrier-R | AGAP003176     | GTGCTTGGCTGTGTGCTGGA<br>CGTTGGCCTGTACCGTCTCG                 |
| TEP2-F<br>TEP2-R                     | AGAP008366     | GCACCTGGCTGACAGCGTTT<br>CCCTGACCCTGCACCTCCTT                 |
