# Supplementary material for: 20-Hydroxyecdysone Primes Innate Immune Responses That Limit Bacterial and Malarial Parasite Survival in Anopheles gambiae
Source: PubMed Central journal article supplement (PMC7160685; doi:10.1128/msphere.00983-19), 2020-04-15
Supplement: mSphere.00983-19-st002.pdf [file mSphere.00983-19-st002.pdf]

**Table S2. Primers used for dsRNA synthesis**

| <b>Primer</b>   | <b>Gene ID</b> | <b>Sequence (5' - 3')</b>                        |
|-----------------|----------------|--------------------------------------------------|
| GFP-T7-F        |                | TAATACGACTCACTATAGGGAGAATGGTGAGCAAGGGCGAGGAGCTGT |
| GFP-T7-R        |                | TAATACGACTCACTATAGGGAGATTACTTGTACAGCTCGTCCATGCC  |
| Cecropin 3-T7-F | AGAP000694     | TAATACGACTCACTATAGGGTCAGTCTGAGATCTCTTCCCGT       |
| Cecropin 3-T7-R |                | TAATACGACTCACTATAGGGAGATTACTTGTACAGCTCGTCCATGCC  |
